# Supplementary material
Source: HighWire-hosted journal article supplement (doi:10.1101/rna.079682.123)
Supplement: Supplemental_Table_S1.xlsx [file Supplemental_Table_S1.xlsx]

## Sheet: Sheet1
Order	Species	Data Source	Accession Number	Link
Blattodea	Blattella germanica	NCBI	GCA_000762945.2	https://ftp.ncbi.nlm.nih.gov/genomes/all/GCA/000/762/945/GCA_000762945.2_Bger_2.0
Blattodea	Coptotermes formosanus	NCBI	GCA_013340265.1	https://ftp.ncbi.nlm.nih.gov/genomes/all/GCA/013/340/265/GCA_013340265.1_CopFor1.0
Blattodea	Zootermopsis nevadensis	NCBI	GCF_000696155.1	https://ftp.ncbi.nlm.nih.gov/genomes/all/GCF/000/696/155/GCF_000696155.1_ZooNev1.0
Coleoptera	Abscondita terminalis	NCBI	GCA_013368085.1	https://ftp.ncbi.nlm.nih.gov/genomes/all/GCA/013/368/085/GCA_013368085.1_Ate
Coleoptera	Adranes taylori	NCBI	GCA_009867245.1	https://ftp.ncbi.nlm.nih.gov/genomes/all/GCA/009/867/245/GCA_009867245.1_ASM986724v1
Coleoptera	Aenictocupidus jacobsonorum	NCBI	GCA_010014765.1	https://ftp.ncbi.nlm.nih.gov/genomes/all/GCA/010/014/765/GCA_010014765.1_ASM1001476v1
Coleoptera	Aethina tumida	NCBI	GCF_001937115.1	https://ftp.ncbi.nlm.nih.gov/genomes/all/GCF/001/937/115/GCF_001937115.1_Atum_1.0
Coleoptera	Agrilus planipennis	NCBI	GCF_000699045.2	https://ftp.ncbi.nlm.nih.gov/genomes/all/GCF/000/699/045/GCF_000699045.2_Apla_2.0
Coleoptera	Aleochara bilineata	NCBI	GCA_003054995.1	https://ftp.ncbi.nlm.nih.gov/genomes/all/GCA/003/054/995/GCA_003054995.1_ASM305499v1
Coleoptera	Anoplophora glabripennis	NCBI	GCF_000390285.2	https://ftp.ncbi.nlm.nih.gov/genomes/all/GCF/000/390/285/GCF_000390285.2_Agla_2.0
Coleoptera	Asbolus verrucosus	NCBI	GCA_004193795.1	https://ftp.ncbi.nlm.nih.gov/genomes/all/GCA/004/193/795/GCA_004193795.1_BDFB_1.0
Coleoptera	Callosobruchus maculatus	NCBI	GCA_900659725.1	https://ftp.ncbi.nlm.nih.gov/genomes/all/GCA/900/659/725/GCA_900659725.1_ASM90065972v1
Coleoptera	Chrysina resplendens	NCBI	GCA_010091895.1	https://ftp.ncbi.nlm.nih.gov/genomes/all/GCA/010/091/895/GCA_010091895.1_ASM1009189v1
Coleoptera	Coccinella septempunctata	NCBI	GCF_907165205.1	https://ftp.ncbi.nlm.nih.gov/genomes/all/GCF/907/165/205/GCF_907165205.1_icCocSept1.1
Coleoptera	Dendroctonus ponderosae	NCBI	GCF_000355655.1	https://ftp.ncbi.nlm.nih.gov/genomes/all/GCF/000/355/655/GCF_000355655.1_DendPond_male_1.0
Coleoptera	Diabrotica virgifera	NCBI	GCF_003013835.1	https://ftp.ncbi.nlm.nih.gov/genomes/all/GCF/003/013/835/GCF_003013835.1_Dvir_v2.0
Coleoptera	Elaeidobius kamerunicus	NCBI	GCA_014849505.1	https://ftp.ncbi.nlm.nih.gov/genomes/all/GCA/014/849/505/GCA_014849505.1_AAL_Ekam_1.0
Coleoptera	Gonioctena quinquepunctata	NCBI	GCA_018342105.1	https://ftp.ncbi.nlm.nih.gov/genomes/all/GCA/018/342/105/GCA_018342105.1_ULB_GQUI_1.0
Coleoptera	Harmonia axyridis	NCBI	GCF_914767665.1	https://ftp.ncbi.nlm.nih.gov/genomes/all/GCF/914/767/665/GCF_914767665.1_icHarAxyr1.1
Coleoptera	Hycleus phaleratus	NCBI	GCA_013841185.1	https://ftp.ncbi.nlm.nih.gov/genomes/all/GCA/013/841/185/GCA_013841185.1_ASM1384118v1
Coleoptera	Ignelater luminosus	NCBI	GCA_011009095.1	https://ftp.ncbi.nlm.nih.gov/genomes/all/GCA/011/009/095/GCA_011009095.1_Ilumi1.2
Coleoptera	Ips nitidus	NCBI	GCA_018691245.1	https://ftp.ncbi.nlm.nih.gov/genomes/all/GCA/018/691/245/GCA_018691245.1_ASM1869124v1
Coleoptera	Lamprigera yunnana	NCBI	GCA_013368075.1	https://ftp.ncbi.nlm.nih.gov/genomes/all/GCA/013/368/075/GCA_013368075.1_ASM1336807v1
Coleoptera	Leptinotarsa decemlineata	NCBI	GCF_000500325.1	https://ftp.ncbi.nlm.nih.gov/genomes/all/GCF/000/500/325/GCF_000500325.1_Ldec_2.0
Coleoptera	Marronus borbonicus	NCBI	GCA_902655005.2	https://ftp.ncbi.nlm.nih.gov/genomes/all/GCA/902/655/005/GCA_902655005.2_Marronus_mpgtue_10X
Coleoptera	Nebria ingens	InsectBase	IBG_00565	http://v2.insect-genome.com/Organism/565
Coleoptera	Nicrophorus vespilloides	NCBI	GCF_001412225.1	https://ftp.ncbi.nlm.nih.gov/genomes/all/GCF/001/412/225/GCF_001412225.1_Nicve_v1.0
Coleoptera	Onthophagus taurus	NCBI	GCF_000648695.1	https://ftp.ncbi.nlm.nih.gov/genomes/all/GCF/000/648/695/GCF_000648695.1_Otau_2.0
Coleoptera	Ophraella communa	NCBI	GCA_902651945.1	https://ftp.ncbi.nlm.nih.gov/genomes/all/GCA/902/651/945/GCA_902651945.1_Ophraella_communa_draft_assembly
Coleoptera	Oryzaephilus surinamensis	NCBI	GCA_004796505.1	https://ftp.ncbi.nlm.nih.gov/genomes/all/GCA/004/796/505/GCA_004796505.1_ASM479650v1
Coleoptera	Photinus pyralis	NCBI	GCF_008802855.1	https://ftp.ncbi.nlm.nih.gov/genomes/all/GCF/008/802/855/GCF_008802855.1_Ppyr1.3
Coleoptera	Pogonus chalceus	NCBI	GCA_002278615.1	https://ftp.ncbi.nlm.nih.gov/genomes/all/GCA/002/278/615/GCA_002278615.1_Pchal_1.0
Coleoptera	Popillia japonica	NCBI	GCA_004785975.1	https://ftp.ncbi.nlm.nih.gov/genomes/all/GCA/004/785/975/GCA_004785975.1_GSC_JBeet_1.0
Coleoptera	Protaetia brevitarsis	NCBI	GCA_004143645.1	https://ftp.ncbi.nlm.nih.gov/genomes/all/GCA/004/143/645/GCA_004143645.1_ASM414364v1
Coleoptera	Pyrocoelia pectoralis	NCBI	GCA_913698365.1	https://ftp.ncbi.nlm.nih.gov/genomes/all/GCA/913/698/365/GCA_913698365.1_Ppec13
Coleoptera	Rhagonycha fulva	NCBI	GCA_905340355.1	https://ftp.ncbi.nlm.nih.gov/genomes/all/GCA/905/340/355/GCA_905340355.1_icRhaFulv1.1
Coleoptera	Rhynchophorus ferrugineus	NCBI	GCA_012979105.1	https://ftp.ncbi.nlm.nih.gov/genomes/all/GCA/012/979/105/GCA_012979105.1_ASM1297910v1
Coleoptera	Sitophilus oryzae	NCBI	GCF_002938485.1	https://ftp.ncbi.nlm.nih.gov/genomes/all/GCF/002/938/485/GCF_002938485.1_Soryzae_2.0
Coleoptera	Tenebrio molitor	NCBI	GCA_014282415.2	https://ftp.ncbi.nlm.nih.gov/genomes/all/GCA/014/282/415/GCA_014282415.2_Tmol_A_ngnome66x_run1.1_130x_genome_v2
Coleoptera	Tribolium castaneum	NCBI	GCF_000002335.3	https://ftp.ncbi.nlm.nih.gov/genomes/all/GCF/000/002/335/GCF_000002335.3_Tcas5.2
Coleoptera	Tribolium madens	NCBI	GCF_015345945.1	https://ftp.ncbi.nlm.nih.gov/genomes/all/GCF/015/345/945/GCF_015345945.1_Tmad_KSU_1.1
Diptera	Aedes aegypti	NCBI	GCF_002204515.2	https://ftp.ncbi.nlm.nih.gov/genomes/all/GCF/002/204/515/GCF_002204515.2_AaegL5.0
Diptera	Aedes albopictus	NCBI	GCF_006496715.1	https://ftp.ncbi.nlm.nih.gov/genomes/all/GCF/006/496/715/GCF_006496715.1_Aalbo_primary.1
Diptera	Anopheles albimanus	NCBI	GCF_013758885.1	https://ftp.ncbi.nlm.nih.gov/genomes/all/GCF/013/758/885/GCF_013758885.1_VT_AalbS3_pri_1.0
Diptera	Anopheles arabiensis	NCBI	GCF_016920715.1	https://ftp.ncbi.nlm.nih.gov/genomes/all/GCF/016/920/715/GCF_016920715.1_AaraD3
Diptera	Anopheles coluzzii	NCBI	GCF_016920705.1	https://ftp.ncbi.nlm.nih.gov/genomes/all/GCF/016/920/705/GCF_016920705.1_AcolMOP1
Diptera	Anopheles gambiae	NCBI	GCF_000005575.2	https://ftp.ncbi.nlm.nih.gov/genomes/all/GCF/000/005/575/GCF_000005575.2_AgamP3
Diptera	Anopheles merus	NCBI	GCF_017562075.2	https://ftp.ncbi.nlm.nih.gov/genomes/all/GCF/017/562/075/GCF_017562075.2_AmerM5.1
Diptera	Anopheles stephensi	NCBI	GCA_000300775.2	https://ftp.ncbi.nlm.nih.gov/genomes/all/GCA/000/300/775/GCA_000300775.2_ASM30077v2
Diptera	Bactrocera dorsalis	NCBI	GCF_000789215.1	https://ftp.ncbi.nlm.nih.gov/genomes/all/GCF/000/789/215/GCF_000789215.1_ASM78921v2
Diptera	Bactrocera oleae	NCBI	GCF_001188975.3	https://ftp.ncbi.nlm.nih.gov/genomes/all/GCF/001/188/975/GCF_001188975.3_MU_Boleae_v2
Diptera	Bactrocera tryoni	NCBI	GCF_016617805.1	https://ftp.ncbi.nlm.nih.gov/genomes/all/GCF/016/617/805/GCF_016617805.1_CSIRO_BtryS06_freeze2
Diptera	Belgica antarctica	NCBI	GCA_000775305.1	https://ftp.ncbi.nlm.nih.gov/genomes/all/GCA/000/775/305/GCA_000775305.1_ASM77530v1
Diptera	Bolitophila cinerea	NCBI	GCA_010015015.1	https://ftp.ncbi.nlm.nih.gov/genomes/all/GCA/010/015/015/GCA_010015015.1_ASM1001501v1
Diptera	Bradysia coprophila	NCBI	GCF_014529535.1	https://ftp.ncbi.nlm.nih.gov/genomes/all/GCF/014/529/535/GCF_014529535.1_BU_Bcop_v1
Diptera	Bradysia odoriphaga	NCBI	GCA_016920775.1	https://ftp.ncbi.nlm.nih.gov/genomes/all/GCA/016/920/775/GCA_016920775.1_B2019C
Diptera	Calliphora vicina	NCBI	GCA_001017275.1	https://ftp.ncbi.nlm.nih.gov/genomes/all/GCA/001/017/275/GCA_001017275.1_ASM101727v1
Diptera	Catotricha subobsoleta	NCBI	GCA_011634745.1	https://ftp.ncbi.nlm.nih.gov/genomes/all/GCA/011/634/745/GCA_011634745.1_ASM1163474v1
Diptera	Ceratitis capitata	NCBI	GCF_000347755.3	https://ftp.ncbi.nlm.nih.gov/genomes/all/GCF/000/347/755/GCF_000347755.3_Ccap_2.1
Diptera	Chaoborus trivitattus	NCBI	GCA_001014815.1	https://ftp.ncbi.nlm.nih.gov/genomes/all/GCA/001/014/815/GCA_001014815.1_ASM101481v1
Diptera	Chironomus riparius	NCBI	GCA_001014505.1	https://ftp.ncbi.nlm.nih.gov/genomes/all/GCA/001/014/505/GCA_001014505.1_ASM101450v1
Diptera	Chironomus tentans	NCBI	GCA_000786525.1	https://ftp.ncbi.nlm.nih.gov/genomes/all/GCA/000/786/525/GCA_000786525.1_CT01
Diptera	Cirrula hians	NCBI	GCA_001015075.1	https://ftp.ncbi.nlm.nih.gov/genomes/all/GCA/001/015/075/GCA_001015075.1_ASM101507v1
Diptera	Clogmia albipunctata	NCBI	GCA_001014945.1	https://ftp.ncbi.nlm.nih.gov/genomes/all/GCA/001/014/945/GCA_001014945.1_ASM101494v1
Diptera	Clunio marinus	NCBI	GCA_900005825.1	https://ftp.ncbi.nlm.nih.gov/genomes/all/GCA/900/005/825/GCA_900005825.1_CLUMA_1.0
Diptera	Coboldia fuscipes	NCBI	GCA_001014335.1	https://ftp.ncbi.nlm.nih.gov/genomes/all/GCA/001/014/335/GCA_001014335.1_ASM101433v1
Diptera	Cochliomyia hominivorax	NCBI	GCA_004302925.1	https://ftp.ncbi.nlm.nih.gov/genomes/all/GCA/004/302/925/GCA_004302925.1_ASM430292v1
Diptera	Coelopa frigida	NCBI	GCA_017309665.1	https://ftp.ncbi.nlm.nih.gov/genomes/all/GCA/017/309/665/GCA_017309665.1_UL_Cfrigida_v1.1
Diptera	Contarinia nasturtii	NCBI	GCF_009176525.2	https://ftp.ncbi.nlm.nih.gov/genomes/all/GCF/009/176/525/GCF_009176525.2_AAFC_CNas_1.1
Diptera	Culex quinquefasciatus	NCBI	GCF_015732765.1	https://ftp.ncbi.nlm.nih.gov/genomes/all/GCF/015/732/765/GCF_015732765.1_VPISU_Cqui_1.0_pri_paternal
Diptera	Dasypogon diadema	NCBI	GCA_006980735.1	https://ftp.ncbi.nlm.nih.gov/genomes/all/GCA/006/980/735/GCA_006980735.1_ASM698073v1
Diptera	Drosophila ananassae	NCBI	GCF_017639315.1	https://ftp.ncbi.nlm.nih.gov/genomes/all/GCF/017/639/315/GCF_017639315.1_ASM1763931v2
Diptera	Drosophila biarmipes	NCBI	GCF_018148935.1	https://ftp.ncbi.nlm.nih.gov/genomes/all/GCF/018/148/935/GCF_018148935.1_ASM1814893v1
Diptera	Drosophila bipectinata	NCBI	GCF_018153845.1	https://ftp.ncbi.nlm.nih.gov/genomes/all/GCF/018/153/845/GCF_018153845.1_ASM1815384v1
Diptera	Drosophila elegans	NCBI	GCF_018152505.1	https://ftp.ncbi.nlm.nih.gov/genomes/all/GCF/018/152/505/GCF_018152505.1_ASM1815250v1
Diptera	Drosophila erecta	NCBI	GCF_003286155.1	https://ftp.ncbi.nlm.nih.gov/genomes/all/GCF/003/286/155/GCF_003286155.1_DereRS2
Diptera	Drosophila eugracilis	NCBI	GCF_018153835.1	https://ftp.ncbi.nlm.nih.gov/genomes/all/GCF/018/153/835/GCF_018153835.1_ASM1815383v1
Diptera	Drosophila grimshawi	NCBI	GCF_018153295.1	https://ftp.ncbi.nlm.nih.gov/genomes/all/GCF/018/153/295/GCF_018153295.1_ASM1815329v1
Diptera	Drosophila hydei	NCBI	GCF_003285905.1	https://ftp.ncbi.nlm.nih.gov/genomes/all/GCF/003/285/905/GCF_003285905.1_DhydRS2
Diptera	Drosophila kikkawai	NCBI	GCF_018152535.1	https://ftp.ncbi.nlm.nih.gov/genomes/all/GCF/018/152/535/GCF_018152535.1_ASM1815253v1
Diptera	Drosophila mauritiana	NCBI	GCF_004382145.1	https://ftp.ncbi.nlm.nih.gov/genomes/all/GCF/004/382/145/GCF_004382145.1_ASM438214v1
Diptera	Drosophila melanogaster	NCBI	GCF_000001215.4	https://ftp.ncbi.nlm.nih.gov/genomes/all/GCF/000/001/215/GCF_000001215.4_Release_6_plus_ISO1_MT
Diptera	Drosophila miranda	NCBI	GCF_003369915.1	https://ftp.ncbi.nlm.nih.gov/genomes/all/GCF/003/369/915/GCF_003369915.1_D.miranda_PacBio2.1
Diptera	Drosophila mojavensis	NCBI	GCF_018153725.1	https://ftp.ncbi.nlm.nih.gov/genomes/all/GCF/018/153/725/GCF_018153725.1_ASM1815372v1
Diptera	Drosophila novamexicana	NCBI	GCF_003285875.2	https://ftp.ncbi.nlm.nih.gov/genomes/all/GCF/003/285/875/GCF_003285875.2_DnovRS2.1
Diptera	Drosophila obscura	NCBI	GCF_018151105.1	https://ftp.ncbi.nlm.nih.gov/genomes/all/GCF/018/151/105/GCF_018151105.1_ASM1815110v1
Diptera	Drosophila persimilis	NCBI	GCF_003286085.1	https://ftp.ncbi.nlm.nih.gov/genomes/all/GCF/003/286/085/GCF_003286085.1_DperRS2
Diptera	Drosophila rhopaloa	NCBI	GCF_018152115.1	https://ftp.ncbi.nlm.nih.gov/genomes/all/GCF/018/152/115/GCF_018152115.1_ASM1815211v1
Diptera	Drosophila sechellia	NCBI	GCF_004382195.1	https://ftp.ncbi.nlm.nih.gov/genomes/all/GCF/004/382/195/GCF_004382195.1_ASM438219v1
Diptera	Drosophila serrata	NCBI	GCF_002093755.1	https://ftp.ncbi.nlm.nih.gov/genomes/all/GCF/002/093/755/GCF_002093755.1_Dser1.0
Diptera	Drosophila simulans	NCBI	GCF_016746395.2	https://ftp.ncbi.nlm.nih.gov/genomes/all/GCF/016/746/395/GCF_016746395.2_Prin_Dsim_3.1
Diptera	Drosophila subobscura	NCBI	GCF_008121235.1	https://ftp.ncbi.nlm.nih.gov/genomes/all/GCF/008/121/235/GCF_008121235.1_UCBerk_Dsub_1.0
Diptera	Drosophila subpulchrella	NCBI	GCF_014743375.2	https://ftp.ncbi.nlm.nih.gov/genomes/all/GCF/014/743/375/GCF_014743375.2_RU_Dsub_v1.1
Diptera	Drosophila suzukii	NCBI	GCF_013340165.1	https://ftp.ncbi.nlm.nih.gov/genomes/all/GCF/013/340/165/GCF_013340165.1_LBDM_Dsuz_2.1.pri
Diptera	Drosophila takahashii	NCBI	GCF_018152695.1	https://ftp.ncbi.nlm.nih.gov/genomes/all/GCF/018/152/695/GCF_018152695.1_ASM1815269v1
Diptera	Drosophila teissieri	NCBI	GCF_016746235.2	https://ftp.ncbi.nlm.nih.gov/genomes/all/GCF/016/746/235/GCF_016746235.2_Prin_Dtei_1.1
Diptera	Drosophila virilis	NCBI	GCF_003285735.1	https://ftp.ncbi.nlm.nih.gov/genomes/all/GCF/003/285/735/GCF_003285735.1_DvirRS2
Diptera	Drosophila willistoni	NCBI	GCF_000005925.1	https://ftp.ncbi.nlm.nih.gov/genomes/all/GCF/000/005/925/GCF_000005925.1_dwil_caf1
Diptera	Drosophila yakuba	NCBI	GCF_016746365.2	https://ftp.ncbi.nlm.nih.gov/genomes/all/GCF/016/746/365/GCF_016746365.2_Prin_Dyak_Tai18E2_2.1
Diptera	Ephydra gracilis	NCBI	GCA_001014675.1	https://ftp.ncbi.nlm.nih.gov/genomes/all/GCA/001/014/675/GCA_001014675.1_ASM101467v1
Diptera	Eristalis dimidiata	NCBI	GCA_001015145.1	https://ftp.ncbi.nlm.nih.gov/genomes/all/GCA/001/015/145/GCA_001015145.1_ASM101514v1
Diptera	Eutreta diana	NCBI	GCA_001015115.1	https://ftp.ncbi.nlm.nih.gov/genomes/all/GCA/001/015/115/GCA_001015115.1_ASM101511v1
Diptera	Glossina austeni	NCBI	GCA_000688735.1	https://ftp.ncbi.nlm.nih.gov/genomes/all/GCA/000/688/735/GCA_000688735.1_Glossina_austeni-1.0.3
Diptera	Glossina brevipalpis	NCBI	GCA_000671755.1	https://ftp.ncbi.nlm.nih.gov/genomes/all/GCA/000/671/755/GCA_000671755.1_Glossina_brevipalpis_1.0.3
Diptera	Glossina fuscipes	NCBI	GCF_014805625.1	https://ftp.ncbi.nlm.nih.gov/genomes/all/GCF/014/805/625/GCF_014805625.1_Yale_Gfus_2
Diptera	Glossina morsitans	NCBI	GCA_001014515.1	https://ftp.ncbi.nlm.nih.gov/genomes/all/GCA/001/014/515/GCA_001014515.1_ASM101451v1
Diptera	Glossina pallidipes	NCBI	GCA_000688715.1	https://ftp.ncbi.nlm.nih.gov/genomes/all/GCA/000/688/715/GCA_000688715.1_Glossina_pallidipes-1.0.3
Diptera	Glossina palpalis	InsectBase	IBG_00406	http://v2.insect-genome.com/Organism/406
Diptera	Habropoda laboriosa	NCBI	GCF_001263275.1	https://ftp.ncbi.nlm.nih.gov/genomes/all/GCF/001/263/275/GCF_001263275.1_ASM126327v1
Diptera	Hermetia illucens	NCBI	GCF_905115235.1	https://ftp.ncbi.nlm.nih.gov/genomes/all/GCF/905/115/235/GCF_905115235.1_iHerIll2.2.curated.20191125
Diptera	Holcocephala fusca	NCBI	GCA_001015215.1	https://ftp.ncbi.nlm.nih.gov/genomes/all/GCA/001/015/215/GCA_001015215.1_ASM101521v1
Diptera	Leucophenga varia	NCBI	GCA_018903435.1	https://ftp.ncbi.nlm.nih.gov/genomes/all/GCA/018/903/435/GCA_018903435.1_ASM1890343v1
Diptera	Liriomyza trifolii	NCBI	GCA_001014935.1	https://ftp.ncbi.nlm.nih.gov/genomes/all/GCA/001/014/935/GCA_001014935.1_ASM101493v1
Diptera	Lucilia cuprina	NCBI	GCF_000699065.1	https://ftp.ncbi.nlm.nih.gov/genomes/all/GCF/000/699/065/GCF_000699065.1_Lcup_2.0
Diptera	Lucilia sericata	NCBI	GCF_015586225.1	https://ftp.ncbi.nlm.nih.gov/genomes/all/GCF/015/586/225/GCF_015586225.1_ASM1558622v1
Diptera	Lutzomyia longipalpis	NCBI	GCA_000265325.1	https://ftp.ncbi.nlm.nih.gov/genomes/all/GCA/000/265/325/GCA_000265325.1_Llon_1.0
Diptera	Megaselia abdita	NCBI	GCA_001015175.1	https://ftp.ncbi.nlm.nih.gov/genomes/all/GCA/001/015/175/GCA_001015175.1_ASM101517v1
Diptera	Megaselia scalaris	NCBI	GCA_000341915.2	https://ftp.ncbi.nlm.nih.gov/genomes/all/GCA/000/341/915/GCA_000341915.2_ASM34191v2
Diptera	Mochlonyx cinctipes	NCBI	GCA_001014845.1	https://ftp.ncbi.nlm.nih.gov/genomes/all/GCA/001/014/845/GCA_001014845.1_ASM101484v1
Diptera	Musca domestica	NCBI	GCF_000371365.1	https://ftp.ncbi.nlm.nih.gov/genomes/all/GCF/000/371/365/GCF_000371365.1_Musca_domestica-2.0.2
Diptera	Paykullia maculata	NCBI	GCA_003055125.1	https://ftp.ncbi.nlm.nih.gov/genomes/all/GCA/003/055/125/GCA_003055125.1_ASM305512v1
Diptera	Phlebotomus papatasi	NCBI	GCA_000262795.1	https://ftp.ncbi.nlm.nih.gov/genomes/all/GCA/000/262/795/GCA_000262795.1_Ppap_1.0
Diptera	Phortica variegata	NCBI	GCA_001014415.1	https://ftp.ncbi.nlm.nih.gov/genomes/all/GCA/001/014/415/GCA_001014415.1_ASM101441v1
Diptera	Polypedilum pembai	NCBI	GCA_014622435.1	https://ftp.ncbi.nlm.nih.gov/genomes/all/GCA/014/622/435/GCA_014622435.1_KFU_Ppem_1.0
Diptera	Polypedilum vanderplanki	NCBI	GCA_018290095.1	https://ftp.ncbi.nlm.nih.gov/genomes/all/GCA/018/290/095/GCA_018290095.1_Pv_5.2
Diptera	Proctacanthus coquilletti	NCBI	GCA_001932985.1	https://ftp.ncbi.nlm.nih.gov/genomes/all/GCA/001/932/985/GCA_001932985.1_200kmer_750.trimmed
Diptera	Propsilocerus akamusi	NCBI	GCA_018397935.1	https://ftp.ncbi.nlm.nih.gov/genomes/all/GCA/018/397/935/GCA_018397935.1_ASM1839793v1
Diptera	Rhagoletis pomonella	NCBI	GCF_013731165.1	https://ftp.ncbi.nlm.nih.gov/genomes/all/GCF/013/731/165/GCF_013731165.1_Rhpom_1.0
Diptera	Rhagoletis zephyria	NCBI	GCF_001687245.1	https://ftp.ncbi.nlm.nih.gov/genomes/all/GCF/001/687/245/GCF_001687245.1_Rhagoletis_zephyria_1.0
Diptera	Scaeva pyrastri	NCBI	GCA_905147095.1	https://ftp.ncbi.nlm.nih.gov/genomes/all/GCA/905/147/095/GCA_905147095.1_idScaPyra1.1_alternate_haplotype
Diptera	Scaptomyza flava	NCBI	GCA_003952975.1	https://ftp.ncbi.nlm.nih.gov/genomes/all/GCA/003/952/975/GCA_003952975.1_Sfla_v1
Diptera	Scaptomyza graminum	NCBI	GCA_018901835.1	https://ftp.ncbi.nlm.nih.gov/genomes/all/GCA/018/901/835/GCA_018901835.1_ASM1890183v1
Diptera	Scaptomyza hsui	NCBI	GCA_018152825.1	https://ftp.ncbi.nlm.nih.gov/genomes/all/GCA/018/152/825/GCA_018152825.1_ASM1815282v1
Diptera	Scaptomyza montana	NCBI	GCA_018904305.1	https://ftp.ncbi.nlm.nih.gov/genomes/all/GCA/018/904/305/GCA_018904305.1_ASM1890430v1
Diptera	Scaptomyza pallida	NCBI	GCA_018152965.1	https://ftp.ncbi.nlm.nih.gov/genomes/all/GCA/018/152/965/GCA_018152965.1_ASM1815296v1
Diptera	Sphyracephala brevicornis	NCBI	GCA_001015235.1	https://ftp.ncbi.nlm.nih.gov/genomes/all/GCA/001/015/235/GCA_001015235.1_ASM101523v1
Diptera	Stomoxys calcitrans	NCBI	GCF_001015335.1	https://ftp.ncbi.nlm.nih.gov/genomes/all/GCF/001/015/335/GCF_001015335.1_Stomoxys_calcitrans-1.0.1
Diptera	Sycophaga agraensis	NCBI	GCA_018906755.1	https://ftp.ncbi.nlm.nih.gov/genomes/all/GCA/018/906/755/GCA_018906755.1_ASM1890675v1
Diptera	Teleopsis dalmanni	NCBI	GCF_002237135.1	https://ftp.ncbi.nlm.nih.gov/genomes/all/GCF/002/237/135/GCF_002237135.1_ASM223713v2
Diptera	Tephritis californica	NCBI	GCA_001017515.1	https://ftp.ncbi.nlm.nih.gov/genomes/all/GCA/001/017/515/GCA_001017515.1_ASM101751v1
Diptera	Tipula oleracea	NCBI	GCA_001017535.1	https://ftp.ncbi.nlm.nih.gov/genomes/all/GCA/001/017/535/GCA_001017535.1_ASM101753v1
Diptera	Trupanea jonesi	NCBI	GCA_001014665.1	https://ftp.ncbi.nlm.nih.gov/genomes/all/GCA/001/014/665/GCA_001014665.1_ASM101466v1
Diptera	Zaprionus africanus	NCBI	GCA_018151435.1	https://ftp.ncbi.nlm.nih.gov/genomes/all/GCA/018/151/435/GCA_018151435.1_ASM1815143v1
Diptera	Zaprionus camerounensis	NCBI	GCA_018904165.1	https://ftp.ncbi.nlm.nih.gov/genomes/all/GCA/018/904/165/GCA_018904165.1_ASM1890416v1
Diptera	Zaprionus capensis	NCBI	GCA_018903675.1	https://ftp.ncbi.nlm.nih.gov/genomes/all/GCA/018/903/675/GCA_018903675.1_ASM1890367v1
Diptera	Zaprionus davidi	NCBI	GCA_018903715.1	https://ftp.ncbi.nlm.nih.gov/genomes/all/GCA/018/903/715/GCA_018903715.1_ASM1890371v1
Diptera	Zaprionus gabonicus	NCBI	GCA_018903695.1	https://ftp.ncbi.nlm.nih.gov/genomes/all/GCA/018/903/695/GCA_018903695.1_ASM1890369v1
Diptera	Zaprionus ghesquierei	NCBI	GCA_018904095.1	https://ftp.ncbi.nlm.nih.gov/genomes/all/GCA/018/904/095/GCA_018904095.1_ASM1890409v1
Diptera	Zaprionus kolodkinae	NCBI	GCA_018901885.1	https://ftp.ncbi.nlm.nih.gov/genomes/all/GCA/018/901/885/GCA_018901885.1_ASM1890188v1
Diptera	Zaprionus nigranus	NCBI	GCA_018903425.1	https://ftp.ncbi.nlm.nih.gov/genomes/all/GCA/018/903/425/GCA_018903425.1_ASM1890342v1
Diptera	Zaprionus ornatus	NCBI	GCA_018904035.1	https://ftp.ncbi.nlm.nih.gov/genomes/all/GCA/018/904/035/GCA_018904035.1_ASM1890403v1
Diptera	Zaprionus taronus	NCBI	GCA_018901805.1	https://ftp.ncbi.nlm.nih.gov/genomes/all/GCA/018/901/805/GCA_018901805.1_ASM1890180v1
Diptera	Zaprionus vittiger	NCBI	GCA_018904025.1	https://ftp.ncbi.nlm.nih.gov/genomes/all/GCA/018/904/025/GCA_018904025.1_ASM1890402v1
Diptera	Zeugodacus cucurbitae	NCBI	GCF_000806345.1	https://ftp.ncbi.nlm.nih.gov/genomes/all/GCF/000/806/345/GCF_000806345.1_ASM80634v1
Ephemeroptera	Baetis rhodani	NCBI	GCA_001676355.1	https://ftp.ncbi.nlm.nih.gov/genomes/all/GCA/001/676/355/GCA_001676355.1_B_61.contig
Ephemeroptera	Cloeon dipterum	NCBI	GCA_902829235.1	https://ftp.ncbi.nlm.nih.gov/genomes/all/GCA/902/829/235/GCA_902829235.1_CLODIP2
Ephemeroptera	Ephemera danica	NCBI	GCA_000507165.2	https://ftp.ncbi.nlm.nih.gov/genomes/all/GCA/000/507/165/GCA_000507165.2_Edan_2.0
Hemiptera	Acyrthosiphon pisum	NCBI	GCF_005508785.1	https://ftp.ncbi.nlm.nih.gov/genomes/all/GCF/005/508/785/GCF_005508785.1_pea_aphid_22Mar2018_4r6ur
Hemiptera	Aphis craccivora	NCBI	GCA_009835225.1	https://ftp.ncbi.nlm.nih.gov/genomes/all/GCA/009/835/225/GCA_009835225.1_LBME_Acra_1.0
Hemiptera	Aphis gossypii	NCBI	GCF_004010815.1	https://ftp.ncbi.nlm.nih.gov/genomes/all/GCF/004/010/815/GCF_004010815.1_ASM401081v1
Hemiptera	Apolygus lucorum	NCBI	GCA_009739505.2	https://ftp.ncbi.nlm.nih.gov/genomes/all/GCA/009/739/505/GCA_009739505.2_ASM973950v2
Hemiptera	Aulacorthum solani	NCBI	GCA_008528875.1	https://ftp.ncbi.nlm.nih.gov/genomes/all/GCA/008/528/875/GCA_008528875.1_ASM852887v1
Hemiptera	Bemisia tabaci	NCBI	GCF_001854935.1	https://ftp.ncbi.nlm.nih.gov/genomes/all/GCF/001/854/935/GCF_001854935.1_ASM185493v1
Hemiptera	Cimex lectularius	NCBI	GCF_000648675.2	https://ftp.ncbi.nlm.nih.gov/genomes/all/GCF/000/648/675/GCF_000648675.2_Clec_2.1
Hemiptera	Diaphorina citri	NCBI	GCF_000475195.1	https://ftp.ncbi.nlm.nih.gov/genomes/all/GCF/000/475/195/GCF_000475195.1_Diaci_psyllid_genome_assembly_version_1.1
Hemiptera	Diuraphis noxia	NCBI	GCF_001186385.1	https://ftp.ncbi.nlm.nih.gov/genomes/all/GCF/001/186/385/GCF_001186385.1_Dnoxia_1.0
Hemiptera	Eriosoma lanigerum	NCBI	GCA_013282895.1	https://ftp.ncbi.nlm.nih.gov/genomes/all/GCA/013/282/895/GCA_013282895.1_WAA_JIC_1.0
Hemiptera	Ferrisia virgata	NCBI	GCA_900060175.1	https://ftp.ncbi.nlm.nih.gov/genomes/all/GCA/900/060/175/GCA_900060175.1_FVIR
Hemiptera	Halymorpha halys	NCBI	GCA_000696795.2	https://ftp.ncbi.nlm.nih.gov/genomes/all/GCF/000/696/795/GCF_000696795.2_Hhal_2.0
Hemiptera	Homalodisca vitripennis	NCBI	GCF_021130785.1	https://ftp.ncbi.nlm.nih.gov/genomes/all/GCF/021/130/785/GCF_021130785.1_UT_GWSS_2.1
Hemiptera	Hormaphis cornu	NCBI	GCA_017140985.1	https://ftp.ncbi.nlm.nih.gov/genomes/all/GCA/017/140/985/GCA_017140985.1_hormaphis_cornu_26Sep2017_PoQx8
Hemiptera	Melanaphis sacchari	NCBI	GCF_002803265.2	https://ftp.ncbi.nlm.nih.gov/genomes/all/GCF/002/803/265/GCF_002803265.2_SCAv2.0
Hemiptera	Myzus persicae	NCBI	GCF_001856785.1	https://ftp.ncbi.nlm.nih.gov/genomes/all/GCF/001/856/785/GCF_001856785.1_MPER_G0061.0
Hemiptera	Nesidiocoris tenuis	NCBI	GCA_902806785.1	https://ftp.ncbi.nlm.nih.gov/genomes/all/GCA/902/806/785/GCA_902806785.1_CYROTEf_10X_genome
Hemiptera	Nilaparvata lugens	NCBI	GCF_014356525.1	https://ftp.ncbi.nlm.nih.gov/genomes/all/GCF/014/356/525/GCF_014356525.1_ASM1435652v1
Hemiptera	Oncopeltus fasciatus	NCBI	GCA_000696205.2	https://ftp.ncbi.nlm.nih.gov/genomes/all/GCA/000/696/205/GCA_000696205.2_Ofas_2.0
Hemiptera	Orius insidiosus	NCBI	GCA_014119065.1	https://ftp.ncbi.nlm.nih.gov/genomes/all/GCA/014/119/065/GCA_014119065.1_ASM1411906v1
Hemiptera	Orius laevigatus	NCBI	GCA_018703685.1	https://ftp.ncbi.nlm.nih.gov/genomes/all/GCA/018/703/685/GCA_018703685.1_ASM1870368v1
Hemiptera	Paracoccus marginatus	NCBI	GCA_900065295.1	https://ftp.ncbi.nlm.nih.gov/genomes/all/GCA/900/065/295/GCA_900065295.1_PMAR
Hemiptera	Pentalonia nigronervosa	NCBI	GCA_014851325.1	https://ftp.ncbi.nlm.nih.gov/genomes/all/GCA/014/851/325/GCA_014851325.1_Penig_v1
Hemiptera	Phenacoccus solenopsis	NCBI	GCA_009761765.1	https://ftp.ncbi.nlm.nih.gov/genomes/all/GCA/009/761/765/GCA_009761765.1_ASM976176v1
Hemiptera	Pseudococcus longispinus	NCBI	GCA_900064475.1	https://ftp.ncbi.nlm.nih.gov/genomes/all/GCA/900/064/475/GCA_900064475.1_PLON
Hemiptera	Rhodnius prolixus	NCBI	GCA_000181055.3	https://ftp.ncbi.nlm.nih.gov/genomes/all/GCA/000/181/055/GCA_000181055.3_Rhodnius_prolixus-3.0.3
Hemiptera	Rhopalosiphum maidis	NCBI	GCF_003676215.2	https://ftp.ncbi.nlm.nih.gov/genomes/all/GCF/003/676/215/GCF_003676215.2_ASM367621v3
Hemiptera	Riptortus pedestris	NCBI	GCA_020975785.1	https://ftp.ncbi.nlm.nih.gov/genomes/all/GCA/020/975/785/GCA_020975785.1_Rp_Nano_0718
Hemiptera	Schlechtendalia chinensis	NCBI	GCA_019022885.1	https://ftp.ncbi.nlm.nih.gov/genomes/all/GCA/019/022/885/GCA_019022885.1_Schi1.0
Hemiptera	Sipha flava	NCBI	GCF_003268045.1	https://ftp.ncbi.nlm.nih.gov/genomes/all/GCF/003/268/045/GCF_003268045.1_YSA_version1
Hemiptera	Sitobion miscanthi	NCBI	GCA_008086715.1	https://ftp.ncbi.nlm.nih.gov/genomes/all/GCA/008/086/715/GCA_008086715.1_ASM808671v1
Hemiptera	Trialeurodes vaporariorum	NCBI	GCA_011764245.1	https://ftp.ncbi.nlm.nih.gov/genomes/all/GCA/011/764/245/GCA_011764245.1_ASM1176424v1
Hemiptera	Triatoma rubrofasciata	GigaDB	GigaDB_100614	https://ftp.cngb.org/pub/gigadb/pub/10.5524/100001_101000/100614/
Hemiptera	Trionymus perrisii	NCBI	GCA_900050545.1	https://ftp.ncbi.nlm.nih.gov/genomes/all/GCA/900/050/545/GCA_900050545.1_TPER
Hymenoptera	Acromyrmex echinatior	NCBI	GCF_000204515.1	https://ftp.ncbi.nlm.nih.gov/genomes/all/GCF/000/204/515/GCF_000204515.1_Aech_3.9
Hymenoptera	Acromyrmex heyeri	NCBI	GCA_017607565.1	https://ftp.ncbi.nlm.nih.gov/genomes/all/GCA/017/607/565/GCA_017607565.1_ASM1760756v1
Hymenoptera	Acromyrmex insinuator	NCBI	GCA_017607455.1	https://ftp.ncbi.nlm.nih.gov/genomes/all/GCA/017/607/455/GCA_017607455.1_ASM1760745v1
Hymenoptera	Ampulex compressa	NCBI	GCA_019049445.1	https://ftp.ncbi.nlm.nih.gov/genomes/all/GCA/019/049/445/GCA_019049445.1_ASM1904944v1
Hymenoptera	Anopheles vaneedeni	NCBI	GCA_016170025.1	https://ftp.ncbi.nlm.nih.gov/genomes/all/GCA/016/170/025/GCA_016170025.1_Avan.F1
Hymenoptera	Aphaenogaster ashmeadi	NCBI	GCA_003063805.1	https://ftp.ncbi.nlm.nih.gov/genomes/all/GCA/003/063/805/GCA_003063805.1_AZXXQ
Hymenoptera	Aphaenogaster floridana	NCBI	GCA_003063835.1	https://ftp.ncbi.nlm.nih.gov/genomes/all/GCA/003/063/835/GCA_003063835.1_AZXXR
Hymenoptera	Aphaenogaster miamiana	NCBI	GCA_003063725.1	https://ftp.ncbi.nlm.nih.gov/genomes/all/GCA/003/063/725/GCA_003063725.1_AZXXO
Hymenoptera	Aphaenogaster picea	NCBI	GCA_003063865.1	https://ftp.ncbi.nlm.nih.gov/genomes/all/GCA/003/063/865/GCA_003063865.1_AZXXN
Hymenoptera	Aphidius gifuensis	NCBI	GCF_014905175.1	https://ftp.ncbi.nlm.nih.gov/genomes/all/GCF/014/905/175/GCF_014905175.1_ASM1490517v1
Hymenoptera	Apis cerana	NCBI	GCF_001442555.1	https://ftp.ncbi.nlm.nih.gov/genomes/all/GCF/001/442/555/GCF_001442555.1_ACSNU-2.0
Hymenoptera	Apis laboriosa	NCBI	GCF_014066325.1	https://ftp.ncbi.nlm.nih.gov/genomes/all/GCF/014/066/325/GCF_014066325.1_ASM1406632v1
Hymenoptera	Apis mellifera	NCBI	GCF_003254395.2	https://ftp.ncbi.nlm.nih.gov/genomes/all/GCF/003/254/395/GCF_003254395.2_Amel_HAv3.1
Hymenoptera	Apocrypta bakeri	NCBI	GCA_018906985.1	https://ftp.ncbi.nlm.nih.gov/genomes/all/GCA/018/906/985/GCA_018906985.1_ASM1890698v1
Hymenoptera	Athalia rosae	NCBI	GCF_000344095.2	https://ftp.ncbi.nlm.nih.gov/genomes/all/GCF/000/344/095/GCF_000344095.2_Aros_2.0
Hymenoptera	Atta cephalotes	NCBI	GCF_000143395.1	https://ftp.ncbi.nlm.nih.gov/genomes/all/GCF/000/143/395/GCF_000143395.1_Attacep1.0
Hymenoptera	Atta colombica	NCBI	GCF_001594045.1	https://ftp.ncbi.nlm.nih.gov/genomes/all/GCF/001/594/045/GCF_001594045.1_Acol1.0
Hymenoptera	Bombus bifarius	NCBI	GCF_011952205.1	https://ftp.ncbi.nlm.nih.gov/genomes/all/GCF/011/952/205/GCF_011952205.1_Bbif_JDL3187
Hymenoptera	Bombus breviceps	NCBI	GCA_014825925.1	https://ftp.ncbi.nlm.nih.gov/genomes/all/GCA/014/825/925/GCA_014825925.1_ASM1482592v1
Hymenoptera	Bombus campestris	NCBI	GCA_905333015.2	https://ftp.ncbi.nlm.nih.gov/genomes/all/GCA/905/333/015/GCA_905333015.2_iyBomCamp1.2
Hymenoptera	Bombus terrestris	NCBI	GCF_000214255.1	https://ftp.ncbi.nlm.nih.gov/genomes/all/GCF/000/214/255/GCF_000214255.1_Bter_1.0
Hymenoptera	Camponotus floridanus	NCBI	GCF_003227725.1	https://ftp.ncbi.nlm.nih.gov/genomes/all/GCF/003/227/725/GCF_003227725.1_Cflo_v7.5
Hymenoptera	Cataglyphis niger	NCBI	GCA_004329405.1	https://ftp.ncbi.nlm.nih.gov/genomes/all/GCA/004/329/405/GCA_004329405.1_Cnig_gn1
Hymenoptera	Cecidostiba semifascia	NCBI	GCA_900474235.1	https://ftp.ncbi.nlm.nih.gov/genomes/all/GCA/900/474/235/GCA_900474235.1_Csem
Hymenoptera	Cephus cinctus	NCBI	GCF_000341935.1	https://ftp.ncbi.nlm.nih.gov/genomes/all/GCF/000/341/935/GCF_000341935.1_Ccin1
Hymenoptera	Ceratina australensis	NCBI	GCA_004307685.1	https://ftp.ncbi.nlm.nih.gov/genomes/all/GCA/004/307/685/GCA_004307685.1_ASM430768v1
Hymenoptera	Ceratina calcarata	NCBI	GCF_001652005.1	https://ftp.ncbi.nlm.nih.gov/genomes/all/GCF/001/652/005/GCF_001652005.1_ASM165200v1
Hymenoptera	Ceratosolen solmsi	NCBI	GCF_000503995.1	https://ftp.ncbi.nlm.nih.gov/genomes/all/GCF/000/503/995/GCF_000503995.1_CerSol_1.0
Hymenoptera	Chelonus insularis	NCBI	GCF_013357705.1	https://ftp.ncbi.nlm.nih.gov/genomes/all/GCF/013/357/705/GCF_013357705.1_ASM1335770v1
Hymenoptera	Copidosoma floridanum	NCBI	GCF_000648655.2	https://ftp.ncbi.nlm.nih.gov/genomes/all/GCF/000/648/655/GCF_000648655.2_Cflo_2.0
Hymenoptera	Cotesia chilonis	NCBI	GCA_018835575.1	https://ftp.ncbi.nlm.nih.gov/genomes/all/GCA/018/835/575/GCA_018835575.1_Cchi_ZJU_1.0
Hymenoptera	Cotesia congregata	NCBI	GCA_905319865.3	https://ftp.ncbi.nlm.nih.gov/genomes/all/GCA/905/319/865/GCA_905319865.3_Cotesia_congregata_Chromosomal_scale_assembly
Hymenoptera	Cotesia glomerata	NCBI	GCF_020080835.1	https://ftp.ncbi.nlm.nih.gov/genomes/all/GCF/020/080/835/GCF_020080835.1_MPM_Cglom_v2.3
Hymenoptera	Crematogaster levior	NCBI	GCA_901521435.1	https://ftp.ncbi.nlm.nih.gov/genomes/all/GCA/901/521/435/GCA_901521435.1_Clev_1.0
Hymenoptera	Cyphomyrmex costatus	NCBI	GCF_001594065.1	https://ftp.ncbi.nlm.nih.gov/genomes/all/GCF/001/594/065/GCF_001594065.1_Ccosl1.0
Hymenoptera	Diachasma alloeum	NCBI	GCF_001412515.2	https://ftp.ncbi.nlm.nih.gov/genomes/all/GCF/001/412/515/GCF_001412515.2_Dall2.0
Hymenoptera	Diadegma semiclausum	NCBI	GCA_011421695.1	https://ftp.ncbi.nlm.nih.gov/genomes/all/GCA/011/421/695/GCA_011421695.1_ASM1142169v1
Hymenoptera	Diadromus collaris	NCBI	GCA_009394715.1	https://ftp.ncbi.nlm.nih.gov/genomes/all/GCA/009/394/715/GCA_009394715.1_ASM939471v1
Hymenoptera	Dolichoris vasculosae	NCBI	GCA_018907195.1	https://ftp.ncbi.nlm.nih.gov/genomes/all/GCA/018/907/195/GCA_018907195.1_ASM1890719v1
Hymenoptera	Dufourea novaeangliae	NCBI	GCF_001272555.1	https://ftp.ncbi.nlm.nih.gov/genomes/all/GCF/001/272/555/GCF_001272555.1_ASM127255v1
Hymenoptera	Ectemnius lituratus	NCBI	GCA_910593735.2	https://ftp.ncbi.nlm.nih.gov/genomes/all/GCA/910/593/735/GCA_910593735.2_iyEctLitu1.2
Hymenoptera	Eufriesea mexicana	NCBI	GCF_001483705.1	https://ftp.ncbi.nlm.nih.gov/genomes/all/GCF/001/483/705/GCF_001483705.1_ASM148370v1
Hymenoptera	Euglossa dilemma	NCBI	GCA_002201625.1	https://ftp.ncbi.nlm.nih.gov/genomes/all/GCA/002/201/625/GCA_002201625.1_Edil_v1.0
Hymenoptera	Eumacrocentrus americanus	NCBI	GCA_018902335.1	https://ftp.ncbi.nlm.nih.gov/genomes/all/GCA/018/902/335/GCA_018902335.1_ASM1890233v1
Hymenoptera	Eupelmus annulatus	NCBI	GCA_900480025.1	https://ftp.ncbi.nlm.nih.gov/genomes/all/GCA/900/480/025/GCA_900480025.1_Eann
Hymenoptera	Eupelmus urozonus	NCBI	GCA_900480035.1	https://ftp.ncbi.nlm.nih.gov/genomes/all/GCA/900/480/035/GCA_900480035.1_Euro
Hymenoptera	Eupristina koningsbergeri	NCBI	GCA_018907245.1	https://ftp.ncbi.nlm.nih.gov/genomes/all/GCA/018/907/245/GCA_018907245.1_ASM1890724v1
Hymenoptera	Eurytoma adleriae	NCBI	GCA_900480045.1	https://ftp.ncbi.nlm.nih.gov/genomes/all/GCA/900/480/045/GCA_900480045.1_Eadl
Hymenoptera	Euura saliciscinereae	NCBI	GCA_018420115.1	https://ftp.ncbi.nlm.nih.gov/genomes/all/GCA/018/420/115/GCA_018420115.1_EuSal_v.1
Hymenoptera	Fopius arisanus	NCBI	GCF_000806365.1	https://ftp.ncbi.nlm.nih.gov/genomes/all/GCF/000/806/365/GCF_000806365.1_ASM80636v1
Hymenoptera	Formica exsecta	NCBI	GCF_003651465.1	https://ftp.ncbi.nlm.nih.gov/genomes/all/GCF/003/651/465/GCF_003651465.1_ASM365146v1
Hymenoptera	Formica selysi	NCBI	GCA_009859135.1	https://ftp.ncbi.nlm.nih.gov/genomes/all/GCA/009/859/135/GCA_009859135.1_ASM985913v1
Hymenoptera	Frieseomelitta varia	NCBI	GCF_011392965.1	https://ftp.ncbi.nlm.nih.gov/genomes/all/GCF/011/392/965/GCF_011392965.1_Fvar_1.2
Hymenoptera	Gonatopus flavifemur	NCBI	GCA_018340375.1	https://ftp.ncbi.nlm.nih.gov/genomes/all/GCA/018/340/375/GCA_018340375.1_Gfla_zju_1.0
Hymenoptera	Goniozus legneri	NCBI	GCA_003055095.1	https://ftp.ncbi.nlm.nih.gov/genomes/all/GCA/003/055/095/GCA_003055095.1_ASM305509v1
Hymenoptera	Harpegnathos saltator	NCBI	GCF_003227715.1	https://ftp.ncbi.nlm.nih.gov/genomes/all/GCF/003/227/715/GCF_003227715.1_Hsal_v8.5
Hymenoptera	Leptopilina clavipes	NCBI	GCA_001855655.1	https://ftp.ncbi.nlm.nih.gov/genomes/all/GCA/001/855/655/GCA_001855655.1_ASM185565v1
Hymenoptera	Leptopilina heterotoma	NCBI	GCF_015476425.1	https://ftp.ncbi.nlm.nih.gov/genomes/all/GCF/015/476/425/GCF_015476425.1_ASM1547642v1
Hymenoptera	Linepithema humile	NCBI	GCF_000217595.1	https://ftp.ncbi.nlm.nih.gov/genomes/all/GCF/000/217/595/GCF_000217595.1_Lhum_UMD_V04
Hymenoptera	Lysiphlebus fabarum	NCBI	GCA_011426435.1	https://ftp.ncbi.nlm.nih.gov/genomes/all/GCA/011/426/435/GCA_011426435.1_ASM1142643v1
Hymenoptera	Macrocentrus cingulum	NCBI	GCA_002156465.1	https://ftp.ncbi.nlm.nih.gov/genomes/all/GCA/002/156/465/GCA_002156465.1_MCINOGS1.0
Hymenoptera	Megachile rotundata	NCBI	GCF_000220905.1	https://ftp.ncbi.nlm.nih.gov/genomes/all/GCF/000/220/905/GCF_000220905.1_MROT_1.0
Hymenoptera	Megalopta genalis	NCBI	GCF_011865705.1	https://ftp.ncbi.nlm.nih.gov/genomes/all/GCF/011/865/705/GCF_011865705.1_USU_MGEN_1.2
Hymenoptera	Megastigmus dorsalis	NCBI	GCA_900490025.1	https://ftp.ncbi.nlm.nih.gov/genomes/all/GCA/900/490/025/GCA_900490025.1_Mdor
Hymenoptera	Melipona quadrifasciata	NCBI	GCA_001276565.1	https://ftp.ncbi.nlm.nih.gov/genomes/all/GCA/001/276/565/GCA_001276565.1_ASM127656v1
Hymenoptera	Microplitis demolitor	NCBI	GCF_000572035.2	https://ftp.ncbi.nlm.nih.gov/genomes/all/GCF/000/572/035/GCF_000572035.2_Mdem2
Hymenoptera	Monomorium pharaonis	NCBI	GCF_013373865.1	https://ftp.ncbi.nlm.nih.gov/genomes/all/GCF/013/373/865/GCF_013373865.1_ASM1337386v2
Hymenoptera	Nasonia vitripennis	NCBI	GCF_009193385.2	https://ftp.ncbi.nlm.nih.gov/genomes/all/GCF/009/193/385/GCF_009193385.2_Nvit_psr_1.1
Hymenoptera	Nomia melanderi	NCBI	GCF_003710045.1	https://ftp.ncbi.nlm.nih.gov/genomes/all/GCF/003/710/045/GCF_003710045.1_USU_Nmel_1.2
Hymenoptera	Nylanderia fulva	NCBI	GCF_005281655.1	https://ftp.ncbi.nlm.nih.gov/genomes/all/GCF/005/281/655/GCF_005281655.1_TAMU_Nfulva_1.0
Hymenoptera	Odontomachus brunneus	NCBI	GCF_010583005.1	https://ftp.ncbi.nlm.nih.gov/genomes/all/GCF/010/583/005/GCF_010583005.1_Obru_v1
Hymenoptera	Ooceraea biroi	NCBI	GCF_003672135.1	https://ftp.ncbi.nlm.nih.gov/genomes/all/GCF/003/672/135/GCF_003672135.1_Obir_v5.4
Hymenoptera	Ormyrus nitidulus	NCBI	GCA_900474335.1	https://ftp.ncbi.nlm.nih.gov/genomes/all/GCA/900/474/335/GCA_900474335.1_Onit
Hymenoptera	Ormyrus pomaceus	NCBI	GCA_900474385.1	https://ftp.ncbi.nlm.nih.gov/genomes/all/GCA/900/474/385/GCA_900474385.1_Opom
Hymenoptera	Orussus abietinus	NCBI	GCF_000612105.2	https://ftp.ncbi.nlm.nih.gov/genomes/all/GCF/000/612/105/GCF_000612105.2_Oabi_2.0
Hymenoptera	Philotrypesis tridentata	NCBI	GCA_018906965.1	https://ftp.ncbi.nlm.nih.gov/genomes/all/GCA/018/906/965/GCA_018906965.1_ASM1890696v1
Hymenoptera	Platyscapa corneri	NCBI	GCA_018907185.1	https://ftp.ncbi.nlm.nih.gov/genomes/all/GCA/018/907/185/GCA_018907185.1_ASM1890718v1
Hymenoptera	Pogonomyrmex barbatus	NCBI	GCF_000187915.1	https://ftp.ncbi.nlm.nih.gov/genomes/all/GCF/000/187/915/GCF_000187915.1_Pbar_UMD_V03
Hymenoptera	Polistes dominula	NCBI	GCF_001465965.1	https://ftp.ncbi.nlm.nih.gov/genomes/all/GCF/001/465/965/GCF_001465965.1_Pdom_r1.2
Hymenoptera	Polistes dorsalis	NCBI	GCA_010416905.1	https://ftp.ncbi.nlm.nih.gov/genomes/all/GCA/010/416/905/GCA_010416905.1_CU_Pdor_10
Hymenoptera	Polistes fuscatus	NCBI	GCF_010416935.1	https://ftp.ncbi.nlm.nih.gov/genomes/all/GCF/010/416/935/GCF_010416935.1_CU_Pfus_HIC
Hymenoptera	Polistes metricus	NCBI	GCA_010416925.1	https://ftp.ncbi.nlm.nih.gov/genomes/all/GCA/010/416/925/GCA_010416925.1_CU_Pmet_PB
Hymenoptera	Pseudoatta argentina	NCBI	GCA_017607525.1	https://ftp.ncbi.nlm.nih.gov/genomes/all/GCA/017/607/525/GCA_017607525.1_ASM1760752v1
Hymenoptera	Pseudomyrmex concolor	NCBI	GCA_014839585.1	https://ftp.ncbi.nlm.nih.gov/genomes/all/GCA/014/839/585/GCA_014839585.1_ASM1483958v1
Hymenoptera	Pseudomyrmex elongatus	NCBI	GCA_014825605.1	https://ftp.ncbi.nlm.nih.gov/genomes/all/GCA/014/825/605/GCA_014825605.1_ASM1482560v1
Hymenoptera	Pseudomyrmex gracilis	NCBI	GCF_002006095.1	https://ftp.ncbi.nlm.nih.gov/genomes/all/GCF/002/006/095/GCF_002006095.1_ASM200609v1
Hymenoptera	Pteromalus puparum	NCBI	GCA_012977825.2	https://ftp.ncbi.nlm.nih.gov/genomes/all/GCA/012/977/825/GCA_012977825.2_ZJU_Ppup_chr_1.0
Hymenoptera	Solenopsis fugax	NCBI	GCA_003595255.1	https://ftp.ncbi.nlm.nih.gov/genomes/all/GCA/003/595/255/GCA_003595255.1_Sf_gnA
Hymenoptera	Solenopsis invicta	NCBI	GCF_016802725.1	https://ftp.ncbi.nlm.nih.gov/genomes/all/GCF/016/802/725/GCF_016802725.1_UNIL_Sinv_3.0
Hymenoptera	Synergus gifuensis	NCBI	GCA_904066015.1	https://ftp.ncbi.nlm.nih.gov/genomes/all/GCA/904/066/015/GCA_904066015.1_P7705_102_v2
Hymenoptera	Synergus japonicus	NCBI	GCA_900474275.1	https://ftp.ncbi.nlm.nih.gov/genomes/all/GCA/900/474/275/GCA_900474275.1_Synjap
Hymenoptera	Temnothorax curvispinosus	NCBI	GCF_003070985.1	https://ftp.ncbi.nlm.nih.gov/genomes/all/GCF/003/070/985/GCF_003070985.1_ASM307098v1
Hymenoptera	Temnothorax longispinosus	NCBI	GCA_004794745.1	https://ftp.ncbi.nlm.nih.gov/genomes/all/GCA/004/794/745/GCA_004794745.1_tlon_1.0
Hymenoptera	Tetragonula carbonaria	NCBI	GCA_010645115.1	https://ftp.ncbi.nlm.nih.gov/genomes/all/GCA/010/645/115/GCA_010645115.1_Tetragonula_carbonaria_1.1
Hymenoptera	Tetragonula clypearis	NCBI	GCA_010645135.1	https://ftp.ncbi.nlm.nih.gov/genomes/all/GCA/010/645/135/GCA_010645135.1_Tetragonula_clypearis_1.1
Hymenoptera	Torymus auratus	NCBI	GCA_900474315.1	https://ftp.ncbi.nlm.nih.gov/genomes/all/GCA/900/474/315/GCA_900474315.1_Taur
Hymenoptera	Torymus geranii	NCBI	GCA_900474355.1	https://ftp.ncbi.nlm.nih.gov/genomes/all/GCA/900/474/355/GCA_900474355.1_Tger
Hymenoptera	Trichogramma evanescens	NCBI	GCA_902732785.1	https://ftp.ncbi.nlm.nih.gov/genomes/all/GCA/902/732/785/GCA_902732785.1_TRIGEV_GD011_Illumina
Hymenoptera	Trichomalopsis sarcophagae	NCBI	GCA_002249905.1	https://ftp.ncbi.nlm.nih.gov/genomes/all/GCA/002/249/905/GCA_002249905.1_ASM224990v1
Hymenoptera	Venturia canescens	NCBI	GCF_019457755.1	https://ftp.ncbi.nlm.nih.gov/genomes/all/GCF/019/457/755/GCF_019457755.1_ASM1945775v1
Hymenoptera	Vespa mandarinia	NCBI	GCF_014083535.2	https://ftp.ncbi.nlm.nih.gov/genomes/all/GCF/014/083/535/GCF_014083535.2_V.mandarinia_Nanaimo_p1.0
Hymenoptera	Vollenhovia emeryi	NCBI	GCF_000949405.1	https://ftp.ncbi.nlm.nih.gov/genomes/all/GCF/000/949/405/GCF_000949405.1_V.emery_V1.0
Hymenoptera	Wasmannia auropunctata	NCBI	GCF_000956235.1	https://ftp.ncbi.nlm.nih.gov/genomes/all/GCF/000/956/235/GCF_000956235.1_wasmannia.A_1.0
Hymenoptera	Wiebesia pumilae	NCBI	GCA_018907045.1	https://ftp.ncbi.nlm.nih.gov/genomes/all/GCA/018/907/045/GCA_018907045.1_ASM1890704v1
Ixodida	Ixodes scapularis	NCBI	GCF_016920785.2	https://ftp.ncbi.nlm.nih.gov/genomes/all/GCF/016/920/785/GCF_016920785.2_ASM1692078v2
Lepidoptera	Actias luna	NCBI	GCA_010014465.1	https://ftp.ncbi.nlm.nih.gov/genomes/all/GCA/010/014/465/GCA_010014465.1_ASM1001446v1
Lepidoptera	Adela reaumurella	NCBI	GCA_009867175.1	https://ftp.ncbi.nlm.nih.gov/genomes/all/GCA/009/867/175/GCA_009867175.1_ASM986717v1
Lepidoptera	Adoxophyes honmai	NCBI	GCA_005406045.1	https://ftp.ncbi.nlm.nih.gov/genomes/all/GCA/005/406/045/GCA_005406045.1_Ah_1.0
Lepidoptera	Alychna victa	NCBI	GCA_018250175.1	https://ftp.ncbi.nlm.nih.gov/genomes/all/GCA/018/250/175/GCA_018250175.1_SRR7174557
Lepidoptera	Amyelois transitella	NCBI	GCF_001186105.1	https://ftp.ncbi.nlm.nih.gov/genomes/all/GCF/001/186/105/GCF_001186105.1_ASM118610v1
Lepidoptera	Antheraea pernyi	NCBI	GCA_015888305.1	https://ftp.ncbi.nlm.nih.gov/genomes/all/GCA/015/888/305/GCA_015888305.1_AP_1.0
Lepidoptera	Ardaris sela	InsectBase	IBG_00094	http://v2.insect-genome.com/Organism/90
Lepidoptera	Aricia agestis	NCBI	GCF_905147365.1	https://ftp.ncbi.nlm.nih.gov/genomes/all/GCF/905/147/365/GCF_905147365.1_ilAriAges1.1
Lepidoptera	Aspitha aspitha	InsectBase	IBG_00090	http://v2.insect-genome.com/Organism/94
Lepidoptera	Bicyclus anynana	NCBI	GCF_900239965.1	https://ftp.ncbi.nlm.nih.gov/genomes/all/GCF/900/239/965/GCF_900239965.1_Bicyclus_anynana_v1.2
Lepidoptera	Bombyx huttoni	NCBI	GCA_002197625.1	https://ftp.ncbi.nlm.nih.gov/genomes/all/GCA/002/197/625/GCA_002197625.1_Bhut1
Lepidoptera	Bombyx mandarina	NCBI	GCF_003987935.1	https://ftp.ncbi.nlm.nih.gov/genomes/all/GCF/003/987/935/GCF_003987935.1_ASM398793v1
Lepidoptera	Bombyx mori	NCBI	GCF_014905235.1	https://ftp.ncbi.nlm.nih.gov/genomes/all/GCF/014/905/235/GCF_014905235.1_Bmori_2016v1.0
Lepidoptera	Busseola fusca	NCBI	GCA_007844875.1	https://ftp.ncbi.nlm.nih.gov/genomes/all/GCA/007/844/875/GCA_007844875.1_ASM784487v1
Lepidoptera	Calephelis nemesis	NCBI	GCA_002245505.1	https://ftp.ncbi.nlm.nih.gov/genomes/all/GCA/002/245/505/GCA_002245505.1_Cne_v1
Lepidoptera	Calephelis virginiensis	NCBI	GCA_002245475.1	https://ftp.ncbi.nlm.nih.gov/genomes/all/GCA/002/245/475/GCA_002245475.1_Cvi_v1
Lepidoptera	Chilo suppressalis	NCBI	GCA_004000445.1	https://ftp.ncbi.nlm.nih.gov/genomes/all/GCA/004/000/445/GCA_004000445.1_ASM400044v1
Lepidoptera	Clostera curtula	NCBI	GCA_905475325.1	https://ftp.ncbi.nlm.nih.gov/genomes/all/GCA/905/475/325/GCA_905475325.1_ilCloCurt1.1_alternate_haplotype
Lepidoptera	Cnaphalocrocis exigua	NCBI	GCA_019059595.1	https://ftp.ncbi.nlm.nih.gov/genomes/all/GCA/019/059/595/GCA_019059595.1_ASM1905959v1
Lepidoptera	Cnaphalocrocis medinalis	NCBI	GCA_014851415.1	https://ftp.ncbi.nlm.nih.gov/genomes/all/GCA/014/851/415/GCA_014851415.1_ASM1485141v1
Lepidoptera	Colias croceus	NCBI	GCF_905220415.1	https://ftp.ncbi.nlm.nih.gov/genomes/all/GCF/905/220/415/GCF_905220415.1_ilColCroc2.1
Lepidoptera	Conopomorpha cramerella	NCBI	GCA_012932125.1	https://ftp.ncbi.nlm.nih.gov/genomes/all/GCA/012/932/125/GCA_012932125.1_ASM1293212v1
Lepidoptera	Croniades pieria	InsectBase	IBG_00216	http://v2.insect-genome.com/Organism/216
Lepidoptera	Cydia pomonella	NCBI	GCA_003425675.2	https://ftp.ncbi.nlm.nih.gov/genomes/all/GCA/003/425/675/GCA_003425675.2_Cpom.V2
Lepidoptera	Danaus plexippus	NCBI	GCF_009731565.1	https://ftp.ncbi.nlm.nih.gov/genomes/all/GCF/009/731/565/GCF_009731565.1_Dplex_v4
Lepidoptera	Dendrolimus punctatus	NCBI	GCA_012273795.1	https://ftp.ncbi.nlm.nih.gov/genomes/all/GCA/012/273/795/GCA_012273795.1_ASM1227379v1
Lepidoptera	Diatraea saccharalis	NCBI	GCA_014843785.1	https://ftp.ncbi.nlm.nih.gov/genomes/all/GCA/014/843/785/GCA_014843785.1_ESALQ_Dsac_1.0
Lepidoptera	Drepana arcuata	NCBI	GCA_016069955.1	https://ftp.ncbi.nlm.nih.gov/genomes/all/GCA/016/069/955/GCA_016069955.1_CAR_DARC_1.0
Lepidoptera	Ectropis grisescens	NCBI	GCA_017562165.1	https://ftp.ncbi.nlm.nih.gov/genomes/all/GCA/017/562/165/GCA_017562165.1_ASM1756216v1
Lepidoptera	Epargyreus clarus	InsectBase	IBG_00363	http://v2.insect-genome.com/Organism/363
Lepidoptera	Erynnis tages	NCBI	GCA_905147245.1	https://ftp.ncbi.nlm.nih.gov/genomes/all/GCA/905/147/245/GCA_905147245.1_ilEryTage1.1_alternate_haplotype
Lepidoptera	Galleria mellonella	NCBI	GCF_003640425.2	https://ftp.ncbi.nlm.nih.gov/genomes/all/GCF/003/640/425/GCF_003640425.2_ASM364042v2
Lepidoptera	Heliconius erato	InsectBase	IBG_00425	http://v2.insect-genome.com/Organism/425
Lepidoptera	Heliconius hierax	NCBI	GCA_900068475.1	https://ftp.ncbi.nlm.nih.gov/genomes/all/GCA/900/068/475/GCA_900068475.1_Heliconius_hierax.CAM008149
Lepidoptera	Heliconius ismenius	NCBI	GCA_001485965.1	https://ftp.ncbi.nlm.nih.gov/genomes/all/GCA/001/485/965/GCA_001485965.1_Heliconius_ismenius.STRI_003
Lepidoptera	Heliconius nattereri	NCBI	GCA_013403645.1	https://ftp.ncbi.nlm.nih.gov/genomes/all/GCA/013/403/645/GCA_013403645.1_ASM1340364v1
Lepidoptera	Heliconius pardalinus	NCBI	GCA_900068005.1	https://ftp.ncbi.nlm.nih.gov/genomes/all/GCA/900/068/005/GCA_900068005.1_Heliconius_pardalinus.09-371
Lepidoptera	Heliconius wallacei	NCBI	GCA_900068815.1	https://ftp.ncbi.nlm.nih.gov/genomes/all/GCA/900/068/815/GCA_900068815.1_Heliconius_wallacei.JM-04-200
Lepidoptera	Heliconius xanthocles	NCBI	GCA_900068825.1	https://ftp.ncbi.nlm.nih.gov/genomes/all/GCA/900/068/825/GCA_900068825.1_Heliconius_xanthocles.CAM009106
Lepidoptera	Hestina assimilis	NCBI	GCA_016906905.1	https://ftp.ncbi.nlm.nih.gov/genomes/all/GCA/016/906/905/GCA_016906905.1_SNNU
Lepidoptera	Hyles vespertilio	NCBI	GCA_009982885.1	https://ftp.ncbi.nlm.nih.gov/genomes/all/GCA/009/982/885/GCA_009982885.1_ASM998288v1
Lepidoptera	Hypermnestra helios	InsectBase	IBG_00459	http://v2.insect-genome.com/Organism/459
Lepidoptera	Hyphantria cunea	NCBI	GCA_003709505.1	https://ftp.ncbi.nlm.nih.gov/genomes/all/GCA/003/709/505/GCA_003709505.1_ASM370950v1
Lepidoptera	Hypolimnas misippus	NCBI	GCA_008963455.1	https://ftp.ncbi.nlm.nih.gov/genomes/all/GCA/008/963/455/GCA_008963455.1_UofC_Hmis_v1.0
Lepidoptera	Laparus doris	NCBI	GCA_900068325.1	https://ftp.ncbi.nlm.nih.gov/genomes/all/GCA/900/068/325/GCA_900068325.1_Heliconius_doris.JM-02-1939
Lepidoptera	Lerema accius	NCBI	GCA_001278395.1	https://ftp.ncbi.nlm.nih.gov/genomes/all/GCA/001/278/395/GCA_001278395.1_lac_assembly_V1
Lepidoptera	Lysandra bellargus	NCBI	GCA_905333045.1	https://ftp.ncbi.nlm.nih.gov/genomes/all/GCA/905/333/045/GCA_905333045.1_ilLysBell1.1
Lepidoptera	Manduca sexta	NCBI	GCF_014839805.1	https://ftp.ncbi.nlm.nih.gov/genomes/all/GCF/014/839/805/GCF_014839805.1_JHU_Msex_v1.0
Lepidoptera	Maniola hyperantus	NCBI	GCF_902806685.1	https://ftp.ncbi.nlm.nih.gov/genomes/all/GCF/902/806/685/GCF_902806685.1_iAphHyp1.1
Lepidoptera	Maniola jurtina	NCBI	GCF_905333055.1	https://ftp.ncbi.nlm.nih.gov/genomes/all/GCF/905/333/055/GCF_905333055.1_ilManJurt1.1
Lepidoptera	Melitaea cinxia	NCBI	GCF_905220565.1	https://ftp.ncbi.nlm.nih.gov/genomes/all/GCF/905/220/565/GCF_905220565.1_ilMelCinx1.1
Lepidoptera	Operophtera brumata	NCBI	GCA_001266575.1	https://ftp.ncbi.nlm.nih.gov/genomes/all/GCA/001/266/575/GCA_001266575.1_ASM126657v1
Lepidoptera	Osmia bicornis	NCBI	GCF_907164935.1	https://ftp.ncbi.nlm.nih.gov/genomes/all/GCF/907/164/935/GCF_907164935.1_iOsmBic2.1
Lepidoptera	Ostrinia furnacalis	NCBI	GCF_004193835.1	https://ftp.ncbi.nlm.nih.gov/genomes/all/GCF/004/193/835/GCF_004193835.1_ASM419383v1
Lepidoptera	Ostrinia nubilalis	NCBI	GCA_008921685.1	https://ftp.ncbi.nlm.nih.gov/genomes/all/GCA/008/921/685/GCA_008921685.1_ASM892168v1
Lepidoptera	Oxynetra roscius	InsectBase	IBG_00605	http://v2.insect-genome.com/Organism/605
Lepidoptera	Papilio bianor	NCBI	GCA_011763625.1	https://ftp.ncbi.nlm.nih.gov/genomes/all/GCA/011/763/625/GCA_011763625.1_ASM1176362v1
Lepidoptera	Papilio dardanus	InsectBase	IBG_00609	http://v2.insect-genome.com/Organism/609
Lepidoptera	Papilio glaucus	NCBI	GCA_000931545.1	https://ftp.ncbi.nlm.nih.gov/genomes/all/GCA/000/931/545/GCA_000931545.1_pgl_assembly_v1
Lepidoptera	Papilio machaon	NCBI	GCF_912999745.1	https://ftp.ncbi.nlm.nih.gov/genomes/all/GCF/912/999/745/GCF_912999745.1_ilPapMach1.1
Lepidoptera	Papilio polytes	NCBI	GCF_000836215.1	https://ftp.ncbi.nlm.nih.gov/genomes/all/GCF/000/836/215/GCF_000836215.1_Ppol_1.0
Lepidoptera	Papilio xuthus	NCBI	GCF_000836235.1	https://ftp.ncbi.nlm.nih.gov/genomes/all/GCF/000/836/235/GCF_000836235.1_Pxut_1.0
Lepidoptera	Pararge aegeria	NCBI	GCF_905163445.1	https://ftp.ncbi.nlm.nih.gov/genomes/all/GCF/905/163/445/GCF_905163445.1_ilParAegt1.1
Lepidoptera	Pieris brassicae	NCBI	GCF_905147105.1	https://ftp.ncbi.nlm.nih.gov/genomes/all/GCF/905/147/105/GCF_905147105.1_ilPieBrab1.1
Lepidoptera	Pieris macdunnoughii	InsectBase	IBG_00636	http://v2.insect-genome.com/Organism/636
Lepidoptera	Pieris rapae	NCBI	GCF_905147795.1	https://ftp.ncbi.nlm.nih.gov/genomes/all/GCF/905/147/795/GCF_905147795.1_ilPieRapa1.1
Lepidoptera	Plutella xylostella	NCBI	GCF_905116875.1	https://ftp.ncbi.nlm.nih.gov/genomes/all/GCF/905/116/875/GCF_905116875.1_Haplomerged_assembly
Lepidoptera	Pyrrhopyge hadassa	InsectBase	IBG_00676	http://v2.insect-genome.com/Organism/676
Lepidoptera	Samia ricini	NCBI	GCA_014132275.1	https://ftp.ncbi.nlm.nih.gov/genomes/all/GCA/014/132/275/GCA_014132275.1_Sr_UT_JL_v1.0
Lepidoptera	Scirpophaga incertulas	NCBI	GCA_020086525.1	https://ftp.ncbi.nlm.nih.gov/genomes/all/GCA/020/086/525/GCA_020086525.1_ASM2008652v1
Lepidoptera	Spodoptera frugiperda	NCBI	GCF_011064685.1	https://ftp.ncbi.nlm.nih.gov/genomes/all/GCF/011/064/685/GCF_011064685.1_ZJU_Sfru_1.0
Lepidoptera	Spodoptera litura	NCBI	GCF_002706865.1	https://ftp.ncbi.nlm.nih.gov/genomes/all/GCF/002/706/865/GCF_002706865.1_ASM270686v1
Lepidoptera	Trichoplusia ni	NCBI	GCF_003590095.1	https://ftp.ncbi.nlm.nih.gov/genomes/all/GCF/003/590/095/GCF_003590095.1_tn1
Lepidoptera	Zerene cesonia	NCBI	GCF_012273895.1	https://ftp.ncbi.nlm.nih.gov/genomes/all/GCF/012/273/895/GCF_012273895.1_Zerene_cesonia_1.1
Odonata	Ischnura elegans	NCBI	GCF_921293095.1	https://ftp.ncbi.nlm.nih.gov/genomes/all/GCF/921/293/095/GCF_921293095.1_ioIscEleg1.1
Orthoptera	Gryllus bimaculatus	NCBI	GCA_017312745.1	https://ftp.ncbi.nlm.nih.gov/genomes/all/GCA/017/312/745/GCA_017312745.1_Gbim_1.0
Orthoptera	Laupala kohalensis	NCBI	GCA_002313205.1	https://ftp.ncbi.nlm.nih.gov/genomes/all/GCA/002/313/205/GCA_002313205.1_ASM231320v1
Phasmatodea	Clitarchus hookeri	NCBI	GCA_002778355.1	https://ftp.ncbi.nlm.nih.gov/genomes/all/GCA/002/778/355/GCA_002778355.1_ASM277835v1
Phasmatodea	Medauroidea extradentata	NCBI	GCA_003012365.1	https://ftp.ncbi.nlm.nih.gov/genomes/all/GCA/003/012/365/GCA_003012365.1_ASM301236v1
Plecoptera	Amphinemura sulcicollis	NCBI	GCA_001676325.1	https://ftp.ncbi.nlm.nih.gov/genomes/all/GCA/001/676/325/GCA_001676325.1_ASM167632v1
Plecoptera	Brachyptera putata	NCBI	GCA_907164815.1	https://ftp.ncbi.nlm.nih.gov/genomes/all/GCA/907/164/815/GCA_907164815.1_iBraPut3m.1_alternate_haplotype
